# Supplementary material
Source: MDPI journal article supplement (https://www.mdpi.com/2071-1050/16/6/2267)
Supplement: s1 [file s1 › sustainability-2827717-supplementary.pdf]

# Modified Clinoptilolite for the Removal of Rhodamine B Dye from Wastewater

Syed Fawad Ali Shah <sup>1</sup>, Fatima Khitab <sup>2</sup>, Shagufta Rasool <sup>1,2</sup>, Rozina Khattak <sup>2,\*</sup>, Tasmia <sup>2,\*</sup>, Hajera Gul <sup>2</sup>, Riaz Muhammad <sup>1</sup>, Muhammad Sufaid Khan <sup>3</sup>, Munaza Naseem <sup>4</sup> and Zane Vincevica-Gaile <sup>5,\*</sup>

<sup>1</sup> Department of Chemistry, Sarhad University of Science and Information Technology, Peshawar 25000, Pakistan; fawadalishah746@gmail.com (S.F.A.S.); fatima1tayyab2@gmail.com (S.R.); riazm.chemistry@suit.edu.pk (R.M.)

<sup>2</sup> Department of Chemistry, Shaheed Benazir Bhutto Women University, Peshawar 25000, Pakistan; fatima\_khitab@yahoo.com (F.K.); hajeragul11@yahoo.com (H.G.)

<sup>3</sup> Department of Chemistry, University of Chitral, Chitral 17200, Pakistan; sufaid.khan@uoch.edu.pk

<sup>4</sup> Department of Environmental Sciences, The Women University Multan, Multan 66000, Pakistan; munaza127@yahoo.com

<sup>5</sup> Department of Environmental Science, University of Latvia, LV-1004 Riga, Latvia

\* Correspondence: rznkhattak@sbbwu.edu.pk (R.K.); dr.tasmia@sbbwu.edu.pk (T.); zane.gaile@lu.lv (Z.V.-G.)

## Surface Area Determination of the Adsorbent

For determination of surface area, 0.1g of modified CLN was added in 10 mL of the standard iodine solution. Then the solution was kept on a hot plate stirrer for one hour at room temperature. Then the solution was diluted up to 50 mL with distilled water and kept for one hour until the solution reached its equivalence point. The solution was filtered by using filter paper. 10 mL filtrate was taken in titration flask, standardized sodium thiosulfate solution was filled up to the mark in the burette and continued the addition of sodium thiosulfate solution drop wise into the titration flask until the solution turned pale yellow, then 3-4 mL starch solution was added to the pale yellow solution which got dark blue. This dark blue color was because of free iodine which was present in the solution combined with starch to form a complex. Then the solution was again titrated with sodium thiosulfate until the color was disappeared. Results are given in Table S1 and S2.

Table S1 Concentration of iodine solution before filtration.

Mean normality of  $\text{Na}_2\text{S}_2\text{O}_3 \cdot 5\text{H}_2\text{O} = 0.19$

| I <sub>2</sub> solution volume | Sodium Thiosulfate solution Consumed volume | I <sub>2</sub> solution Normality | I <sub>2</sub> means normality |
|--------------------------------|---------------------------------------------|-----------------------------------|--------------------------------|
| 10                             | 32.5                                        | 0.617                             | 0.614                          |
| 10                             | 32                                          | 0.608                             |                                |
| 10                             | 32.5                                        | 0.617                             |                                |

Table S2. Concentration of iodine solution after filtration for the determination of average normality of sodium thiosulfate.

| I <sub>2</sub> volume | The consumed volume of sodium Thiosulfate solution | I <sub>2</sub> Normality | I <sub>2</sub> Average normality |
|-----------------------|----------------------------------------------------|--------------------------|----------------------------------|
| 10                    | 6.8                                                | 0.136                    | 0.118                            |
| 10                    | 5.6                                                | 0.112                    |                                  |
| 10                    | 5.3                                                | 0.106                    |                                  |

The surface area of the adsorbent was calculated using equation (S1) which is given below. Surface area results are given in Table S3.

$$\text{Surface Area} = 253.6 \{V_1 (C_i - C_f)\} \quad \text{Eq. (S1)}$$

1 mole of iodine surface area is = 253.6

$V_1$  for iodine solution volume

$C_i$  is the Concentration of iodine solution before adsorption.

After adsorption  $C_f$  is the Concentration of iodine solution

$$\text{S.A} = 253.6 \{V_1 (C_i - C_f)\}$$

$$\text{S.A} = 253.8 [10 (0.614 - 0.59)]$$

S.A = 253.8 [10 (0.024)]

Surface area = 60.912m<sup>2</sup>/g

Table S3. Surface area of modified CLN.

| Sample       | Maximum particle size<br>( $\mu\text{m}$ ) | Surface area<br>( $\text{m}^2\text{g}^{-1}$ ) |
|--------------|--------------------------------------------|-----------------------------------------------|
| Modified CLN | > <b>600</b>                               | 60.192                                        |
| Raw CLN      | > <b>600</b>                               | 47.131                                        |
